# Supplementary material
Source: HighWire-hosted journal article supplement (https://cmaj.ca/highwire/filestream/59085/field_highwire_adjunct_files/0/excess-mallen-1-at.pdf)
Supplement: excess-mallen-1-at.pdf [file excess-mallen-1-at.pdf]

**Appendix 1 (as supplied by the authors): Flowchart of participant selection**

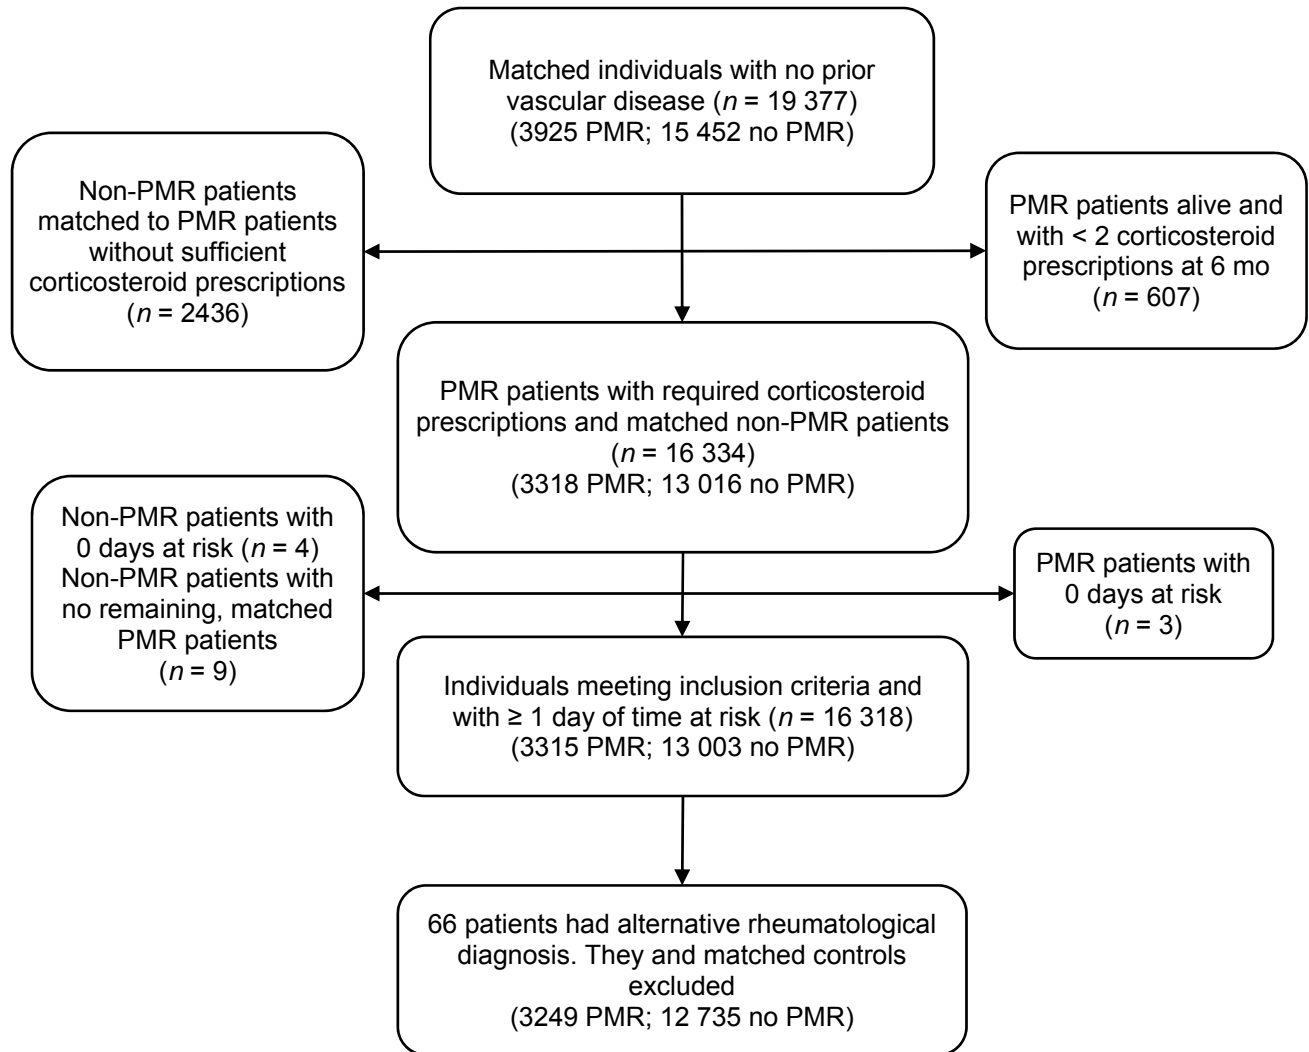

Note: PMR = polymyalgia rheumatica.
